## CORRECTION

# Correction: Association between self-esteem and efficacy and mental health in people with disabilities

The *PLOS ONE* Editors

There are errors in the Author Contributions of the first author, Jong Youn Moon. The correct contributions are: Investigation, Validation, Writing–review & editing.

In addition, the Funding statement is incorrect. The correct statement is: The authors received no specific funding for this work.

## Reference

1. Moon JY, Kim J- H (2021) Association between self-esteem and efficacy and mental health in people with disabilities. *PLoS ONE* 16(10): e0257943. <https://doi.org/10.1371/journal.pone.0257943> PMID: [34613985](https://pubmed.ncbi.nlm.nih.gov/34613985/)

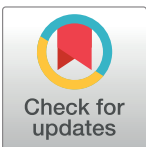

## OPEN ACCESS

**Citation:** The *PLOS ONE* Editors (2024) Correction: Association between self-esteem and efficacy and mental health in people with disabilities. *PLoS ONE* 19(5): e0303430. <https://doi.org/10.1371/journal.pone.0303430>

**Published:** May 3, 2024

**Copyright:** © 2024 The PLOS ONE Editors. This is an open access article distributed under the terms of the [Creative Commons Attribution License](https://creativecommons.org/licenses/by/4.0/), which permits unrestricted use, distribution, and reproduction in any medium, provided the original author and source are credited.
